# Supplementary material for: Clinical Efficacy and Safety of Yellow Oil Formulations 3 and 4 versus Indomethacin Solution in Patients with Symptomatic Osteoarthritis of the Knee: A Randomized Controlled Trial
Source: Hindawi journal article supplement (doi:10.1155/2020/5782178), 2020-01-01
Supplement: f1 [file 5782178.f1.zip]

**Table S3:** KOOS at baseline, week 2, and week 4

|                                      | YOF3           | YOF4           | INDO           |
|--------------------------------------|----------------|----------------|----------------|
| <b>Pain</b>                          |                |                |                |
| MITT analysis                        |                |                |                |
| Baseline                             | 53.38 ± 13.99  | 56.92 ± 13.20  | 52.75 ± 15.23  |
| Week 2                               | 61.03 ± 14.12* | 60.73 ± 16.20  | 61.00 ± 16.01* |
| Week 4                               | 67.16 ± 14.27* | 66.62 ± 13.97* | 66.56 ± 16.40* |
| PP analysis                          |                |                |                |
| Baseline                             | 52.41 ± 14.28  | 56.32 ± 13.10  | 52.75 ± 15.23  |
| Week 2                               | 60.24 ± 14.44* | 61.48 ± 16.07  | 61.00 ± 16.01* |
| Week 4                               | 67.00 ± 14.82* | 67.60 ± 13.31* | 66.56 ± 16.40* |
| <b>Symptoms</b>                      |                |                |                |
| MITT analysis                        |                |                |                |
| Baseline                             | 58.38 ± 13.78  | 62.54 ± 14.58  | 57.22 ± 13.03  |
| Week 2                               | 65.06 ± 14.50* | 68.31 ± 15.50  | 65.00 ± 15.74* |
| Week 4                               | 69.13 ± 16.31* | 69.77 ± 13.25* | 70.34 ± 13.70* |
| PP analysis                          |                |                |                |
| Baseline                             | 58.66 ± 14.27  | 62.32 ± 14.83  | 57.22 ± 13.03  |
| Week 2                               | 64.31 ± 15.04* | 68.88 ± 15.53  | 65.00 ± 15.74* |
| Week 4                               | 68.79 ± 17.12* | 70.40 ± 13.12* | 70.34 ± 13.70* |
| <b>Activities of daily living</b>    |                |                |                |
| MITT analysis                        |                |                |                |
| Baseline                             | 53.88 ± 14.28  | 55.88 ± 16.18  | 54.03 ± 15.84  |
| Week 2                               | 61.34 ± 14.03* | 61.08 ± 15.65  | 61.25 ± 15.06* |
| Week 4                               | 65.41 ± 14.73* | 65.42 ± 15.99* | 66.94 ± 14.62* |
| PP analysis                          |                |                |                |
| Baseline                             | 53.38 ± 14.52  | 55.24 ± 16.17  | 54.03 ± 15.84  |
| Week 2                               | 60.48 ± 14.06* | 62.04 ± 15.16* | 61.25 ± 15.06* |
| Week 4                               | 64.97 ± 15.03* | 66.58 ± 15.20* | 66.94 ± 14.62* |
| <b>Sport and recreation function</b> |                |                |                |
| MITT analysis                        |                |                |                |
| Baseline                             | 28.59 ± 15.04  | 25.19 ± 21.00  | 28.44 ± 20.22  |
| Week 2                               | 37.50 ± 11.71* | 33.65 ± 22.74* | 29.53 ± 18.72  |
| Week 4                               | 40.00 ± 16.11* | 37.88 ± 21.36* | 41.56 ± 22.27* |
| PP analysis                          |                |                |                |
| Baseline                             | 27.41 ± 15.33  | 25.80 ± 21.20  | 28.44 ± 20.22  |
| Week 2                               | 36.03 ± 11.21* | 35.00 ± 22.13* | 29.53 ± 18.72  |
| Week 4                               | 38.79 ± 16.40* | 39.40 ± 20.33* | 41.56 ± 22.27* |
| <b>Knee-related quality of life</b>  |                |                |                |
| MITT analysis                        |                |                |                |
| Baseline                             | 32.44 ± 16.95  | 33.35 ± 12.61  | 31.75 ± 15.95  |
| Week 2                               | 38.00 ± 14.44* | 29.96 ± 14.86  | 36.63 ± 19.90  |

|             |                |               |                |
|-------------|----------------|---------------|----------------|
| Week 4      | 40.75 ± 17.35* | 38.15 ± 17.05 | 40.91 ± 18.75* |
| PP analysis |                |               |                |
| Baseline    | 32.97 ± 17.41  | 32.92 ± 12.68 | 31.75 ± 15.95  |
| Week 2      | 37.62 ± 14.18  | 30.64 ± 14.75 | 36.63 ± 19.90  |
| Week 4      | 40.66 ± 17.46* | 39.16 ± 16.59 | 40.91 ± 18.75* |

Data represent mean ± SD. \*  $p < 0.05$  versus baseline value (one-way repeated measures ANOVA, followed by LSD test). No statistically significant difference was found between YOF3 or YOF4 versus INDO (one-way ANOVA, followed by the Dunnett test).
