# Supplementary material for: Clinical Efficacy and Safety of Yellow Oil Formulations 3 and 4 versus Indomethacin Solution in Patients with Symptomatic Osteoarthritis of the Knee: A Randomized Controlled Trial
Source: Hindawi journal article supplement (doi:10.1155/2020/5782178), 2020-01-01
Supplement: f1 [file 5782178.f1.zip]

**Table S1(A):** Components of yellow oil formulation 3 (YOF3).

|    | Botanical/chemical name                   | Common name     | Part used | Amount |
|----|-------------------------------------------|-----------------|-----------|--------|
| 1. | <i>Zingiber montanum</i> (Koenig)         | Phlai           | Rhizome   | 95%    |
| 2. | <i>Syzygium aromaticum</i> Merr. et Perry | Clove           | Flower    |        |
| 3. | <i>Cinnamomum aromaticum</i> Nees         | Cinnamon        | Bark      |        |
| 4. | Menthol                                   | Menthol         |           |        |
| 5. | Racemic camphor                           | Racemic camphor |           |        |
| 6. | Borneol                                   | Borneol         |           |        |
| 7. | <i>Sesamum indicum</i> L.                 | Sesame          | Seed oil  | 5%     |

**Table S1(B):** Components of yellow oil formulation 4 (YOF4).

|    | Botanical/chemical name                   | Common name       | Part used     | Amount |
|----|-------------------------------------------|-------------------|---------------|--------|
| 1. | <i>Zingiber montanum</i> (Koenig)         | Phlai             | Rhizome       | 90%    |
| 2. | <i>Curcuma longa</i> L.                   | Turmeric          | Rhizome       |        |
| 3. | <i>Syzygium aromaticum</i> Merr. et Perry | Clove             | Flower        |        |
| 4. | <i>Cocos nucifera</i> Linn.               | Coconut           | Oil           |        |
| 5. | Menthol                                   | Menthol           |               |        |
| 6. | Racemic camphor                           | Racemic camphor   |               |        |
| 7. | Borneol                                   | Borneol           |               |        |
| 8. | Methyl salicylate                         | Methyl salicylate | Essential oil | 10%    |
