# Supplementary material for: Clinical Efficacy and Safety of Yellow Oil Formulations 3 and 4 versus Indomethacin Solution in Patients with Symptomatic Osteoarthritis of the Knee: A Randomized Controlled Trial
Source: Hindawi journal article supplement (doi:10.1155/2020/5782178), 2020-01-01
Supplement: f1 [file 5782178.f1.zip]

**Table S2.** VAS pain, VAS stiffness, SCT, and TUG at baseline, week 2, and week 4.

|                    | YOF3           | YOF4             | INDO           |
|--------------------|----------------|------------------|----------------|
| VAS pain (mm)      |                |                  |                |
| MITT analysis      |                |                  |                |
| Baseline           | 53.75 ± 8.17   | 52.81 ± 9.89     | 49.41 ± 9.85   |
| Week 2             | 41.59 ± 11.55* | 44.77 ± 13.27*   | 38.09 ± 14.59* |
| Week 4             | 28.69 ± 14.02* | 34.31 ± 16.03*   | 26.03 ± 14.17* |
| PP analysis        |                |                  |                |
| Baseline           | 54.10 ± 8.52   | 53.08 ± 9.99     | 49.41 ± 9.85   |
| Week 2             | 42.45 ± 11.79* | 43.88 ± 12.73*   | 38.09 ± 14.59* |
| Week 4             | 28.21 ± 14.65* | 33.00 ± 14.88*   | 26.03 ± 14.17* |
| VAS stiffness (mm) |                |                  |                |
| MITT analysis      |                |                  |                |
| Baseline           | 45.41 ± 14.41  | 51.50 ± 14.99    | 47.72 ± 15.49  |
| Week 2             | 37.56 ± 14.87* | 40.96 ± 16.65*   | 38.50 ± 18.55* |
| Week 4             | 25.81 ± 11.61* | 30.12 ± 15.80*   | 27.69 ± 18.70* |
| PP analysis        |                |                  |                |
| Baseline           | 47.03 ± 13.68  | 52.40 ± 14.56    | 47.72 ± 15.49  |
| Week 2             | 39.55 ± 13.82* | 39.92 ± 16.10*   | 38.50 ± 18.55* |
| Week 4             | 26.59 ± 11.51* | 28.64 ± 14.18*   | 27.69 ± 18.70* |
| SCT (sec)          |                |                  |                |
| MITT analysis      |                |                  |                |
| Baseline           | 9.19 ± 3.09    | 11.50 ± 5.35     | 9.75 ± 3.38    |
| Week 2             | 8.56 ± 2.14    | 10.77 ± 5.16*    | 8.78 ± 3.03*   |
| Week 4             | 8.13 ± 2.09*   | 10.42 ± 5.25*,** | 7.88 ± 2.15*   |
| PP analysis        |                |                  |                |
| Baseline           | 9.17 ± 3.19    | 10.96 ± 4.69     | 9.75 ± 3.38    |
| Week 2             | 8.62 ± 2.23    | 10.16 ± 4.20*    | 8.78 ± 3.03*   |
| Week 4             | 8.14 ± 2.18*   | 9.80 ± 4.26*,**  | 7.88 ± 2.15*   |
| TUG (sec)          |                |                  |                |
| MITT analysis      |                |                  |                |
| Baseline           | 12.91 ± 2.63   | 14.38 ± 4.62     | 13.03 ± 2.71   |
| Week 2             | 12.06 ± 2.33*  | 14.35 ± 5.56     | 12.41 ± 2.92   |
| Week 4             | 11.56 ± 1.95*  | 13.23 ± 4.91*    | 11.59 ± 1.97*  |
| PP analysis        |                |                  |                |
| Baseline           | 12.86 ± 2.60   | 13.84 ± 3.77     | 13.03 ± 2.71   |
| Week 2             | 12.14 ± 2.34   | 13.68 ± 4.49     | 12.41 ± 2.92   |
| Week 4             | 11.59 ± 1.94*  | 12.52 ± 3.38*    | 11.59 ± 1.97*  |

Data represent mean ± SD. \*  $p < 0.05$  versus baseline value (one-way repeated measures ANOVA, followed by LSD test). \*\*  $p < 0.05$  versus INDO (one-way ANOVA, followed by the Dunnett test).
